# Supplementary material for: Novel mechanism of metabolic co-regulation coordinates the biosynthesis of secondary metabolites in Pseudomonas protegens
Source: eLife. 2017 Mar 6;6:e22835. doi: 10.7554/eLife.22835 (PMC5395296; doi:10.7554/eLife.22835)
Supplement: Figure 2—source data 1. — DOI: http://dx.doi.org/10.7554/eLife.22835.005 [file elife-22835-fig2-data1.xlsx]

## Sheet: Figure 2
Source data for Figure 2. Effect of phloroglucinol (PG) and pyoluteorin on the expression of pltL::gfp in P. protegens Pf-5.
		Relative GFP
Strain	Amended compound (nM)	Average	Stdev
WT	Methanol	147.489	17.0154
ΔpltAΔphlD	Methanol	35.8414	6.06645
ΔpltAΔphlD	PG (10)	457.458	10.3058
ΔpltAΔphlD	Plt (100)	38.3015	6.71881
ΔpltAΔphlD	PG (10) + Plt (100)	509.449	8.8347
ΔpltAΔphlDΔpltR	Methanol	40.7803	7.5193
ΔpltAΔphlDΔpltR	PG (10)	38.6161	4.66146
