# Supplementary material for: Novel mechanism of metabolic co-regulation coordinates the biosynthesis of secondary metabolites in Pseudomonas protegens
Source: eLife. 2017 Mar 6;6:e22835. doi: 10.7554/eLife.22835 (PMC5395296; doi:10.7554/eLife.22835)
Supplement: Figure 3—figure supplement 2—source data 1. — DOI: http://dx.doi.org/10.7554/eLife.22835.010 [file elife-22835-fig3-figsupp2-data1.xlsx]

## Sheet: Figure 3-supplement 2
Source data for Figure 3 - figure supplement 2. Production of pyoluteorin, DAPG and MAPG by P. protegens Pf-5 wild-type, ΔpltM mutant, and pltM+ complemented strain.
	Plt production		MAPG production		DAPG production
Strain	Average	Stdev	Average	Stdev	Average	Stdev
WT Pf-5	42.7206	4.00735	0	0	0	0
ΔpltM	0	0	114.375	7.79412	151.507	18.8603
pltM+	41.3603	0.80882	0	0	0	0
