# Supplementary material for: Novel mechanism of metabolic co-regulation coordinates the biosynthesis of secondary metabolites in Pseudomonas protegens
Source: eLife. 2017 Mar 6;6:e22835. doi: 10.7554/eLife.22835 (PMC5395296; doi:10.7554/eLife.22835)
Supplement: Figure 3—source data 1. — (A) Expression of pltL::gfp by SBW25 containing pRL-gfp. (B) Expression of pltL::gfp by Pf-5 wild-type (WT) and the ΔpltM mutant that contains pL-gfp. (C) Expression of pltL::gfp by SBW25 containing pMRL-gfp. DOI: http://dx.doi.org/10.7554/eLife.22835.007 [file elife-22835-fig3-data1.xlsx]

## Sheet: Figure 3
Source data for Figure 3. Effect of phloroglucinol (PG) and Pf-5 culture supernatants on the expression of pltL::gfp in P. fluorescens SBW25 (A, C), and P. protegens Pf-5 (B).
A		Relative GFP
Strain	Amended compound (nM)	Average	Stdev
SBW25(pRL-gfp)	Methanol	48	6.245
	PG (10)	52	6.02771
	WT-sup (1:1 ratio)	1366.67	267.199
	ΔphlD-sup (1:1 ratio)	51	12.0126
B		Relative GFP
Strain	Amended compound (nM)	Average	Stdev
WT Pf-5	Methanol	97.6865	7.04126
ΔpltM	Methanol	43.4398	1.20798
	PG (10)	46.1543	1.34343
	WT-sup (1:1 ratio)	811.671	10.2031
	ΔphlD-sup (1:1 ratio)	45.3215	3.00654
C		Relative GFP
Strain	Amended compound (nM)	Average	Stdev
SBW25(pMRL-gfp)	Methanol	76.3333	8.18535
	PG (10)	2172.33	61.9435
	WT-sup (1:1 ratio)	2064.67	103.413
	ΔphlD-sup (1:1 ratio)	80.1456	15.6974
