# Supplementary material for: Novel mechanism of metabolic co-regulation coordinates the biosynthesis of secondary metabolites in Pseudomonas protegens
Source: eLife. 2017 Mar 6;6:e22835. doi: 10.7554/eLife.22835 (PMC5395296; doi:10.7554/eLife.22835)
Supplement: Figure 5—figure supplement 2—source data 1. — DOI: http://dx.doi.org/10.7554/eLife.22835.017 [file elife-22835-fig5-figsupp2-data1.xlsx]

## Sheet: Figure 5-supplement 2
Source data for Figure 5 - figure supplement 2. Effect of different compounds that have structures similar to phloroglucinol (PG) on the expression of pltL::gfp in P. fluorescens SBW25.
		Relative GFP
Strain	Amended compounds (nM)	Average	Stdev
SBW25(pMRL-gfp)	Methanol	53.2667	2.27156
	PG (10)	2720.13	268.587
	Resorcinol (0.01)	61.5333	8.35005
	Resorcinol (0.1)	54.8333	3.21299
	Resorcinol (1)	56.0333	1.00167
	Resorcinol (10)	54.7	4.20278
	Resorcinol (100)	58.1667	4.59021
	2,4-D (0.01)	56.4333	0.80208
	2,4-D (0.1)	56.9333	0.56862
	2,4-D (1)	57.0667	0.55076
	2,4-D (10)	55.7	1.44222
	2,4-D (100)	55.0667	1.97315
	Triclosan (0.01)	54.1	0.14142
	Triclosan (0.1)	54.1667	0.64291
	Triclosan (1)	54.7	1.13578
	Triclosan (10)	74.9667	4.72687
	Triclosan (100)	128.067	4.70779
