# Supplementary material for: Novel mechanism of metabolic co-regulation coordinates the biosynthesis of secondary metabolites in Pseudomonas protegens
Source: eLife. 2017 Mar 6;6:e22835. doi: 10.7554/eLife.22835 (PMC5395296; doi:10.7554/eLife.22835)
Supplement: Figure 5—source data 1. — EM-1# to −6# refers to extracts from each in vitro reaction with the components shown. DOI: http://dx.doi.org/10.7554/eLife.22835.014 [file elife-22835-fig5-data1.xlsx]

## Sheet: Figure 5
Source data for Figure 5. Effect of extracts from in vitro catalyzed reactions on the expression of pltL::gfp in P. fluorescens SBW25
		Relative GFP
Strain	Amended extracts	Average	Stdev	Components of the in vitro reaction of EM-N#
SBW25(pRL-gfpNT)	Methnol	188.667	88.2454
	EM-1#	4493.67	909.221	PltM, SsuE, FAD, NADPH and PG.
	EM-2#	233.667	120.257	SsuE, FAD, NADPH and PG, but not PltM.
	EM-3#	915	220.551	PltM, FAD, NADPH and PG, but not SsuE.
	EM-4#	242	194.672	PltM, SsuE, NADPH and PG, but not FAD.
	EM-5#	376.667	185.759	PltM, SsuE, FAD and PG, but not NADPH.
	EM-6#	300.667	113.115	PltM, SsuE, FAD and NADPH, but not PG.
