# Supplementary material for: Novel mechanism of metabolic co-regulation coordinates the biosynthesis of secondary metabolites in Pseudomonas protegens
Source: eLife. 2017 Mar 6;6:e22835. doi: 10.7554/eLife.22835 (PMC5395296; doi:10.7554/eLife.22835)
Supplement: Figure 6—figure supplement 1—source data 1. — PG-Cl and PG-Cl2 were tested at different concentrations as indicated. 0 means methanol was added to the cultures as a control. DOI: http://dx.doi.org/10.7554/eLife.22835.021 [file elife-22835-fig6-figsupp1-data1.xlsx]

## Sheet: Figure 6-supplement 1
Souce data for Figure 6 - figure supplement 1. Effect of PG-Cl and PG-Cl2 on the growth of P. fluorescens SBW25.
		OD600			OD600
Strain	Amended PG-Cl (nM)	Average	Stdev	Amended PG-Cl2 (nM)	Average	Stdev
SBW25	0	4.13333	0.05774	0	4.13333	0.05774
	0.001	4.03333	0.05774	0.001	3.4	0.1
	0.01	3.23333	0.25166	0.01	1.63333	0.15275
	0.1	3.13333	0.11547	0.1	0.16667	0.05774
	1	2.4	0.1	1	0.1	1.69967e-17
	10	0.26667	0.05774	10	0.1	1.69967e-17
	100	0.1	1.69967e-17	100	0.1	1.69967e-17
