# Supplementary material for: Novel mechanism of metabolic co-regulation coordinates the biosynthesis of secondary metabolites in Pseudomonas protegens
Source: eLife. 2017 Mar 6;6:e22835. doi: 10.7554/eLife.22835 (PMC5395296; doi:10.7554/eLife.22835)
Supplement: Figure 6—figure supplement 2—source data 1. — DOI: http://dx.doi.org/10.7554/eLife.22835.023 [file elife-22835-fig6-figsupp2-data1.xlsx]

## Sheet: Figure 6-supplement 2
Source data for Figure 6 - figure supplement 2. Effect of PG-Cl and PG-Cl2 on the expression of pltL::gfp (A) and the production of pyoluteorin (B) in the ΔpltMΔphlD mutant and the ΔpltMΔpltR mutant of P. protegens Pf-5.
		Relative GFP		Plt production
Strain	Amended compound (µM)	Average	Stdev	Average	Stdev
WT Pf-5	Methanol	147.489	17.0154	30.2816	4.08905
ΔpltMΔphlD	Methanol	69.7387	1.88347	0	0
	PG (0.1)	78.1883	5.24484	0	0
	PG-Cl (1)	398.793	44.4888	62.2434	6.05091
	PG-Cl2 (0.1)	251.016	13.2212	45.2361	2.54379
ΔpltMΔpltR	Methanol	61.7247	5.39676	0	0
	PG (0.1)	66.5564	0.19744	0	0
	PG-Cl (1)	75.9151	5.23891	0	0
	PG-Cl2 (0.1)	64.2648	2.10515	0	0
