# Supplementary material for: Novel mechanism of metabolic co-regulation coordinates the biosynthesis of secondary metabolites in Pseudomonas protegens
Source: eLife. 2017 Mar 6;6:e22835. doi: 10.7554/eLife.22835 (PMC5395296; doi:10.7554/eLife.22835)
Supplement: Figure 6—figure supplement 3—source data 1. — DOI: http://dx.doi.org/10.7554/eLife.22835.025 [file elife-22835-fig6-figsupp3-data1.xlsx]

## Sheet: Figure 6-supplement 3
Source data for Figure 6 - figure supplement 3. Effect of PG-Cl and PG-Cl2 on the expression of pltL::gfp in P. fluorescens SBW25.
		Relative GFP
Strain	Amended compound (µM)	Average	Stdev
SBW25(pRL-gfp)	Methanol	49.3008	5.54294
	PG-Cl (1)	1800.17	118.8
	PG-Cl2 (0.01)	1250.09	95.3
SBW25(pL-gfp)	Methanol	43.7892	3.83148
	PG-Cl (1)	43.9696	0.50366
	PG-Cl2 (0.01)	44.6947	3.98352
