# Supplementary material for: Novel mechanism of metabolic co-regulation coordinates the biosynthesis of secondary metabolites in Pseudomonas protegens
Source: eLife. 2017 Mar 6;6:e22835. doi: 10.7554/eLife.22835 (PMC5395296; doi:10.7554/eLife.22835)
Supplement: Figure 6—source data 1. — The production of MAPG and DAPG is also shown. DOI: http://dx.doi.org/10.7554/eLife.22835.019 [file elife-22835-fig6-data1.xlsx]

## Sheet: Figure 6
Source data for Figure 6. Influence of PG-Cl (left) and PG-Cl2 (right) on the expression of pltL::gfp (A, B) and the production of pyoluteorin (C, D) in the ΔpltM mutant of P. protegens Pf-5.
Figure 6AC		Relative GFP		OD600		Plt production		MAPG production		DAPG production
Strain	Amended PG-Cl (nM)	Average	Stdev	Average	Stdev	Average	Stdev	Average	Stdev	Average	Stdev
ΔpltM	0	43.4398	1.20798	4.4	0.1	0	0	86.1314	8.86331	71.8803	22.0763
	0.001	35.9877	5.83577	4.43333	0.05774	0	0	66.3053	18.4007	62.7865	16.616
	0.01	37.2379	5.18128	4.43333	0.05774	0	0	75.8045	12.2302	70.491	10.7835
	0.1	62.259	0.49889	4.46667	0.05774	0	0	69.8845	23.3465	64.6773	23.5392
	1	460.259	15.5063	4.43333	0.20817	28.9714	1.533	2.45162	1.24513	1.21025	0.51572
	10	874.671	34.1894	4.03333	0.05774	72.3705	2.5265	0.70827	0.1024	0.53175	0.07725
	100	1130.23	9.24128	3.76667	0.20817	104.976	2.81075	13.727	2.867	7.70675	1.51335
Figure 6BD		Relative GFP		OD600		Plt production		MAPG production		DAPG production
Strain	Amended PG-Cl2 (nM)	Average	Stdev	Average	Stdev	Average	Stdev	Average	Stdev	Average	Stdev
ΔpltM	0	43.4398	1.20798	4.4	0.1	0	0	86.1314	8.86331	71.8803	22.0763
	0.001	45.3215	3.00654	4.46667	0.05774	0	0	78.919	17.6935	81.1123	17.3111
	0.01	366.508	43.3574	4.3	0.1	23.5364	1.48903	3.48763	0.98887	2.123	0.73605
	0.1	892.559	77.2801	4.06667	0.11547	59.3225	2.977	0.77812	0.11803	0.48138	0.04625
	1	1011.66	42.7818	4.1	0.1	83.0987	6.29475	0.842	0.11425	0.474	0.039
	10	795.207	10.6718	3.8	0.1	84.8155	3.85775	1.52923	0.61925	0.00835	0.03151
	100	168.282	87.8248	0.33333	0.10408	58.29	7.0375	0.71508	0.274	0.0296	0.01533
