# Supplementary material for: Novel mechanism of metabolic co-regulation coordinates the biosynthesis of secondary metabolites in Pseudomonas protegens
Source: eLife. 2017 Mar 6;6:e22835. doi: 10.7554/eLife.22835 (PMC5395296; doi:10.7554/eLife.22835)
Supplement: Figure 7—figure supplement 1—source data 1. — Pf-5 wild-type was cultured for different times, as indicated. The culture extracts were tested by SBW25 containing pRL-gfp. DOI: http://dx.doi.org/10.7554/eLife.22835.028 [file elife-22835-fig7-figsupp1-data1.xlsx]

## Sheet: Figure 7-supplement 1
Source data for Figure 7 – figure supplement 1. Levels of signaling compounds in cultures of P. protegens Pf-5 of different ages.
		Relative GFP
Strain	Amended culture extracts from WT Pf-5 (h)	Average	Stdev
SBW25(pRL-gfp)	0	36.6667	14.9332
	5	90.6667	16.5227
	11	97.3333	10.5987
	24	2882.67	157
	48	148.333	19.5021
