# Supplementary material for: Novel mechanism of metabolic co-regulation coordinates the biosynthesis of secondary metabolites in Pseudomonas protegens
Source: eLife. 2017 Mar 6;6:e22835. doi: 10.7554/eLife.22835 (PMC5395296; doi:10.7554/eLife.22835)
Supplement: Figure 7—figure supplement 2—source data 1. — DOI: http://dx.doi.org/10.7554/eLife.22835.030 [file elife-22835-fig7-figsupp2-data1.xlsx]

## Sheet: Figure 7-supplement 2
Source data for Figure 7 – figure supplement 2. Toxicity of pyoluteorin (A) and DAPG (B) to the plant pathogen Erwinia amylovora.
		OD600 of Erwinia amylovora
Amended compounds (µM)		Average	Stdev
Control	NBGly	0.3616	0.00212
	Methanol	0.3581	0.00605
pyoluteorin	36.7	0.01507	0.00204
	18.3	0.01423	0.00231
	9.2	0.01637	0.00187
	7.4	0.05563	0.003
	5.5	0.1042	0.01249
	3.6	0.22943	0.0072
	1.8	0.32853	0.00616
	0.9	0.3411	0.00608
	0.5	0.3444	0.00182
DAPG	285.7	0.0169	0.00537
	238.1	0.01213	0.00399
	190.4	0.0513	0.00354
	142.9	0.22367	0.0024
	95.2	0.31767	0.00303
	47.6	0.36375	0.00332
	23.8	0.34905	0.00686
